# Supplementary material for: Development and Consumer Perception of a Snack Machine Producing Customized Spoonable and Drinkable Products Enriched in Dietary Fiber and Protein
Source: MDPI journal article supplement (doi:10.3390/foods9101454), 2020-10-13
Supplement: s1 [file s1]

# **Development and consumer perception of a snack machine producing customized spoonable and drinkable products enriched in dietary fiber and protein**

## **Supplementary materials:**

**Supplementary data, Table S1:** List of sensory attributes and their reference products in the sensory profiling of drinkable and spoonable cocoa-flavored samples. a: D: drinkable, S: spoonable.

**Supplementary data, Figure S1:** Screenshots of the functional user interface of the HSM (PAGE 5-9). Scoothie wording was used in the user interface as a snack product name. (A) Screenshot of the functional user-interface of the HSM, starting page; (B) Screenshot of the functional user-interface of the HSM, suggestions included six pre-prepared options with fiber (F). (C) Screenshot of the functional user-interface of the HSM, 'create your own' route, selection of consistency, base and flavor. (D) Screenshot of the functional user-interface of the HSM, 'create your own' route, selection of protein, fiber and garnish. (E) Screenshot of the functional user-interface of the HSM, 'create your own' route, nutritional values and selection of the size

**Supplementary data, Table S2:** were related to HSM testing itself, and questions 15-17 were the background questions.

**Supplementary data, Figure S2:** Sensory profiling for drinkable and spoonable samples.

(A) Spider plot of the sensory profile of drinkable cocoa-flavored samples. The plot is drawn using average values of 10 assessors and two replicate evaluations. (B) Spider plot

of the sensory profile of spoonable cocoa-flavored samples. The plot is drawn using average values of 10 assessors and two replicate evaluations. (PAGE 8)

**Supplementary data, Figure S3:** Preferred base and size of the products. (A) Consumers' willingness to buy the samples in the coming month from HSM as they were presented in the consumer test. 1 = very unlikely to buy, 7 = very likely to buy. There was no significant association between sample type and willingness to buy. (B) Consumers' preferred portion sizes for the cocoa-flavored samples. There was no significant association between sample type and preferred portion size. (PAGE 9)

## Supplementary data Table S1.

**Table S1.** List of sensory attributes and their reference products in the sensory profiling of drinkable and spoonable cocoa-flavored samples. a: D: drinkable, S: spoonable.

| <i>Attribute</i>               | <i>Sample types (a)</i> | <i>Description</i>                                                                                             | <i>Reference product</i>                                                                                                                                                                                                                                                      | <i>Intensity</i> |
|--------------------------------|-------------------------|----------------------------------------------------------------------------------------------------------------|-------------------------------------------------------------------------------------------------------------------------------------------------------------------------------------------------------------------------------------------------------------------------------|------------------|
| <b>Odor</b>                    |                         |                                                                                                                |                                                                                                                                                                                                                                                                               |                  |
| <i>Cocoa/Chocolate</i>         | D, S                    | Odor reminiscent of cocoa powder, chocolate or a chocolate beverage                                            | Cocoa drink made on skim milk (1.5% fat, Valio Oy, Helsinki, Finland) containing 2.5% Van Houten cocoa powder (Barry Callebaut Belgium NV, Lebbeke-Wieze, Belgium) and 2.5% sucrose (Suomen Sokeri Oy, Kantvik, Finland). A 40 ml portion was served in a closed plastic cup. | 6                |
| <i>Sweet</i>                   | D                       | Sweet odor                                                                                                     | 10% solution of oat powder (Puhtikaura, Viipurilainen kotileipomo Oy, Vääksy, Suomi) in water.                                                                                                                                                                                | 7                |
| <i>Cereal-like/oat-like</i>    | D, S                    | Odor reminiscent of oat groats or a cereal field                                                               | Halved yellow peas (Arolan tila, Pornainen, Finland) that were heated in a microwave oven. An 8 g portion was served in a closed plastic cup.                                                                                                                                 | 6                |
| <i>Dried pea</i>               | D, S                    | Odor reminiscent of dried peas or beans                                                                        | None                                                                                                                                                                                                                                                                          | 7                |
| <b>Appearance and texture</b>  |                         |                                                                                                                |                                                                                                                                                                                                                                                                               |                  |
| <i>Sedimentation tendency</i>  | D                       | Tendency of the sample to separate into two phases 20 seconds after mixing                                     | Rye porridge made by mixing coarse and fine rye flour in 1:4 ratio to a 15% suspension in water. The solution was boiled for 1 minute and cooled to                                                                                                                           | 2                |
| <i>Ropiness (with a spoon)</i> | S                       | Flowing tendency of the sample when pouring from the spoon; ranges between viscous clumps to long ropy threads |                                                                                                                                                                                                                                                                               | 3                |

| Sensory attributes              |      |                                                                                        | Reference                                                                                       |   |
|---------------------------------|------|----------------------------------------------------------------------------------------|-------------------------------------------------------------------------------------------------|---|
|                                 |      |                                                                                        | ambient temperature. A 40 ml portion was served in a closed plastic cup.                        |   |
| Consistency (spoonable)         | S    | Ability of the sample to resist moving around with a spoon                             | Oat powder solution (as above)                                                                  | 7 |
| Graininess                      | S    | The number of hard particles felt during chewing                                       | Rye porridge (as above)                                                                         | 5 |
|                                 |      |                                                                                        | Oat powder solution (as above)                                                                  | 1 |
|                                 |      |                                                                                        | Rye porridge (as above)                                                                         | 6 |
| Sliminess                       | S    | Feeling of a slippery coating caused by the sample in the mucous membrane of the mouth | Oat powder solution (as above)                                                                  | 9 |
| <b>Taste and flavor</b>         |      |                                                                                        |                                                                                                 |   |
| Sweetness                       | D, S | Sweet taste                                                                            | Cocoa drink (as above)                                                                          | 7 |
| Cocoa/Chocolate                 | D, S | Flavor reminiscent of cocoa powder, chocolate or a chocolate beverage                  |                                                                                                 | 7 |
| Bitterness                      | D, S | Bitter taste                                                                           | Oat powder solution (as above)                                                                  | 7 |
| Cereal-like/oat-like            | D, S | Flavor reminiscent of oat groats or a cereal field                                     |                                                                                                 | 7 |
| Dried pea                       | D, S | Flavor reminiscent of dried peas or beans                                              | Pea reference (as above); flavor intensity was compared to the odor intensity of the reference. | 8 |
|                                 |      |                                                                                        | None                                                                                            |   |
| Possible other flavor intensity | D, S | Intensity of other flavors apart from the attribute list                               |                                                                                                 |   |
| <b>Mouthfeel</b>                |      |                                                                                        |                                                                                                 |   |
| Astringency                     | D    | Mouth drying, puckering or shrinking sensation in the mouth                            | Oat powder solution (as above)                                                                  | 5 |
| Richness/creaminess             | D, S | Sensation of cream-like or velvety                                                     | None                                                                                            |   |

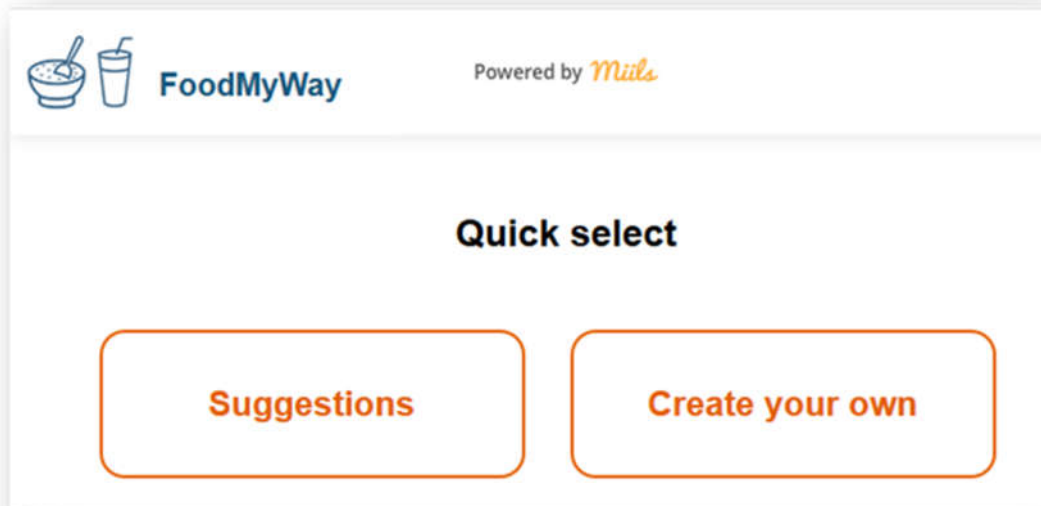

(A)

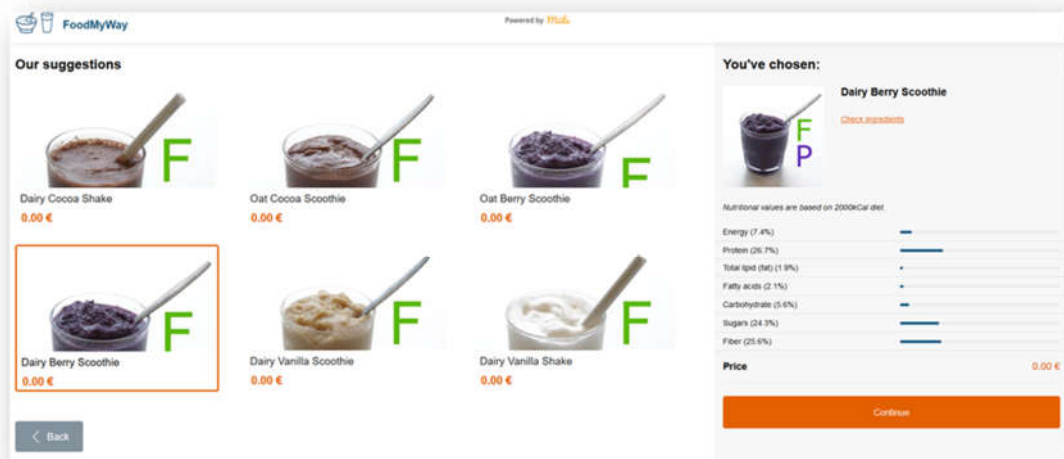

(B)

 FoodMyWay

Powered by 

Consistency

Spoonable

Drinkable

Base

Dairy

Oat

Flavour

Cocoa

Vanilla

Berries

You've chosen:



Dairy Cocoa Scoothie

[Check ingredients](#)

Nutritional values are based on 2000kCal diet.

Energy (5.9%)

Protein (16.0%)

Total lipid (fat) (2.1%)

Fatty acids (1.4%)

Carbohydrate (5.3%)

Sugars (17.1%)

Fiber (15.2%)

Price

0.00 €

Continue

(C)

 FoodMyWay

Powered by 

You have chosen:

Spoonable

Dairy

Cocoa

[Change](#)

Add more

Protein whey  
0.5 €

Fibre  
0.5 €

Garnish

Coconut & chia  
0.5 €

Cranberry-strawberry granola  
0.5 €

Bilberry, lingonberry & strawberry  
0.5 €

Sunflower, pumpkin & sesame seed  
0.5 €

[Remove all extras and garnishes](#)

You've chosen:



Dairy Cocoa Scoothie with Chia and coconut

[Check ingredients](#)

Nutritional values are based on 2000kCal diet.

Energy (10.7%)

Protein (30.6%)

Total lipid (fat) (10.4%)

Fatty acids (19.0%)

Carbohydrate (5.8%)

Sugars (19.0%)

Fiber (37.4%)

Price

0.00 €

Continue

(D)

6

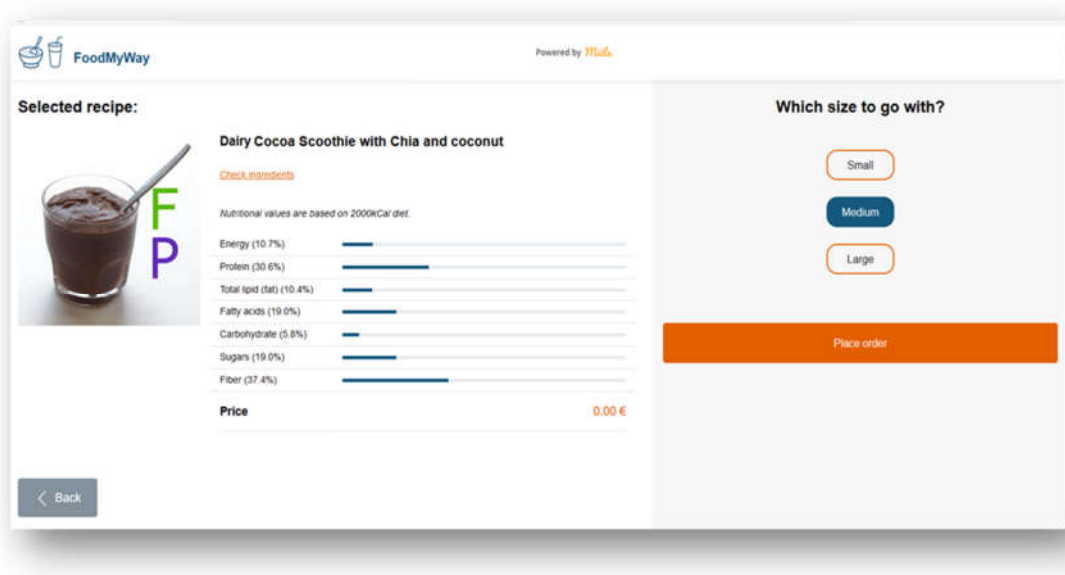

(E)

**Figure S1.** Screenshots of the functional user interface of the HSM (PAGE 5-9). Scoothie wording was used in the user interface as a snack product name. (A) Screenshot of the functional user-interface of the HSM, starting page; (B) Screenshot of the functional user-interface of the HSM, suggestions included six pre-prepared options with fiber (F). (C) Screenshot of the functional user-interface of the HSM, 'create your own' route, selection of consistency, base and flavor. (D) Screenshot of the functional user-interface of the HSM, 'create your own' route, selection of protein, fiber and garnish. (E) Screenshot of the functional user-interface of the HSM, 'create your own' route, nutritional values and selection of the size.

**Supplementary data Table S2.**

**Table S2.** were related to HSM testing itself, and questions 15-17 were the background questions.

| No | Question                                                                                                                                                                                                                                                                                                                                                                                                                                                                                                                                                                                                                                                                                                                                                                                                                                                                                                                                                                                                                          | Options                                                                                          |
|----|-----------------------------------------------------------------------------------------------------------------------------------------------------------------------------------------------------------------------------------------------------------------------------------------------------------------------------------------------------------------------------------------------------------------------------------------------------------------------------------------------------------------------------------------------------------------------------------------------------------------------------------------------------------------------------------------------------------------------------------------------------------------------------------------------------------------------------------------------------------------------------------------------------------------------------------------------------------------------------------------------------------------------------------|--------------------------------------------------------------------------------------------------|
| 1  | What kind of product did you choose?                                                                                                                                                                                                                                                                                                                                                                                                                                                                                                                                                                                                                                                                                                                                                                                                                                                                                                                                                                                              | Self-tailored product<br>Quick choice 1<br>Quick choice 2<br>Quick choice 3                      |
| 2  | The tailored product was...                                                                                                                                                                                                                                                                                                                                                                                                                                                                                                                                                                                                                                                                                                                                                                                                                                                                                                                                                                                                       | Drinkable<br>Spoonable                                                                           |
| 3  | The tailored product was...                                                                                                                                                                                                                                                                                                                                                                                                                                                                                                                                                                                                                                                                                                                                                                                                                                                                                                                                                                                                       | Dairy-based<br>Oat-based<br>Can't remember                                                       |
| 4  | The tailored product was...                                                                                                                                                                                                                                                                                                                                                                                                                                                                                                                                                                                                                                                                                                                                                                                                                                                                                                                                                                                                       | Cocoa-flavored<br>Vanilla-flavored<br>Berry-flavored                                             |
| 5  | Which of the following extras did you choose?                                                                                                                                                                                                                                                                                                                                                                                                                                                                                                                                                                                                                                                                                                                                                                                                                                                                                                                                                                                     | Extra protein<br>Extra fiber<br>Coconut & chia<br>Almond and strawberry muesli<br>Can't remember |
| 6  | Which product size did you choose?                                                                                                                                                                                                                                                                                                                                                                                                                                                                                                                                                                                                                                                                                                                                                                                                                                                                                                                                                                                                | S (1 dl)<br>M (2 dl)<br>L (3 dl)                                                                 |
| 7  | How else would you want to tailor the product or its extras?                                                                                                                                                                                                                                                                                                                                                                                                                                                                                                                                                                                                                                                                                                                                                                                                                                                                                                                                                                      | (Open question)                                                                                  |
| 8  | Evaluate the user experience of the machine and the product you received based on the following statements <ul style="list-style-type: none"> <li>• The machine was easy to use</li> <li>• The UI of the machine was clear</li> <li>• I was able to order the product I wanted easily</li> <li>• I was able to order the product I wanted quickly</li> <li>• I received enough information about the nutritional content of the product I chose</li> <li>• I was able to find an option that I found desirable</li> <li>• The product I received looked appealing</li> <li>• The product I received smelled appealing</li> <li>• The product I received tasted good</li> <li>• The product selection was large enough</li> <li>• There were enough tailoring options available</li> <li>• The product I ordered seemed healthy</li> <li>• My product was prepared quickly enough</li> <li>• The product I received met my expectations</li> <li>• The product took away hunger</li> <li>• The product took away thirst</li> </ul> | 1 - Strongly disagree<br>2 - Disagree<br>3 - Can't say<br>4 - Agree<br>5 - Strongly agree        |
| 9  | How interested would you be in buying products from a machine like this in the future? Which factors have an effect on your interest?                                                                                                                                                                                                                                                                                                                                                                                                                                                                                                                                                                                                                                                                                                                                                                                                                                                                                             | (Open question)                                                                                  |
| 10 | In which situations would you imagine yourself using a machine like this?                                                                                                                                                                                                                                                                                                                                                                                                                                                                                                                                                                                                                                                                                                                                                                                                                                                                                                                                                         | (Open question)                                                                                  |

|    |                                                                                                                                                                                                                                                                                                                                                                                                                                                                                  |                                                                                                                                         |
|----|----------------------------------------------------------------------------------------------------------------------------------------------------------------------------------------------------------------------------------------------------------------------------------------------------------------------------------------------------------------------------------------------------------------------------------------------------------------------------------|-----------------------------------------------------------------------------------------------------------------------------------------|
| 11 | What do you think would be a good location for the machine?                                                                                                                                                                                                                                                                                                                                                                                                                      | (Open question)                                                                                                                         |
| 12 | How much would you be willing to pay for a 2 dl portion? If you want, you can justify your answer.                                                                                                                                                                                                                                                                                                                                                                               | (Open question)                                                                                                                         |
| 13 | What do you think would be a good portion size?                                                                                                                                                                                                                                                                                                                                                                                                                                  | 1 dl<br>2 dl<br>3 dl                                                                                                                    |
| 14 | How do you think the product concept you tested should be developed further?                                                                                                                                                                                                                                                                                                                                                                                                     | (Open question)                                                                                                                         |
| 15 | Gender                                                                                                                                                                                                                                                                                                                                                                                                                                                                           | Male<br>Female<br>Other<br>Don't want to say                                                                                            |
| 16 | Age                                                                                                                                                                                                                                                                                                                                                                                                                                                                              | 18 - 29<br>30 - 39<br>40 - 49<br>50 - 59<br>Over 60<br>Don't want to say                                                                |
| 17 | Choose the options below that best describe your life:<br><ul style="list-style-type: none"> <li>• I eat breakfast</li> <li>• I eat lunch</li> <li>• I eat a snack during the workday</li> <li>• I bring a packed lunch / snack to the workplace from home</li> <li>• I use the vending machine at the workplace</li> <li>• I go to the nearby grocery store during the workday to buy something to eat</li> <li>• I eat snack products (cookies, bars, smoothies...)</li> </ul> | Once a year or less<br>A couple of times a year<br>1 - 3 times a month<br>Once a week<br>2 - 4 times a week<br>Once a day or more often |

**Supplementary data Figure S2.**

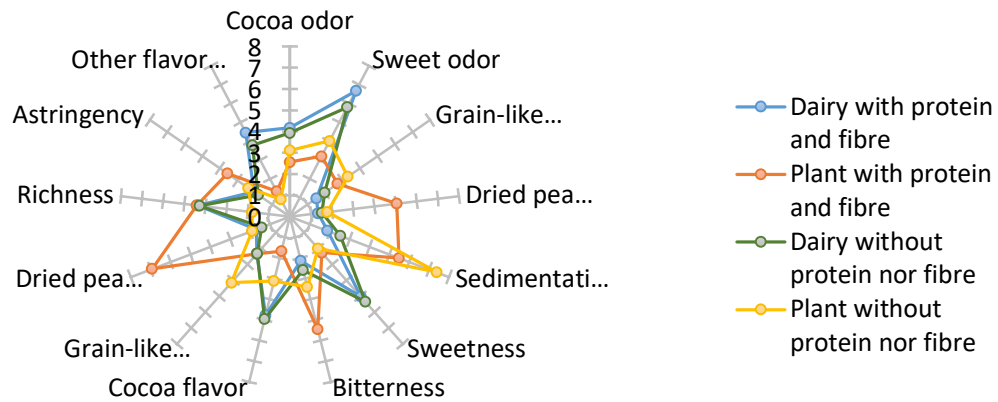

(A)

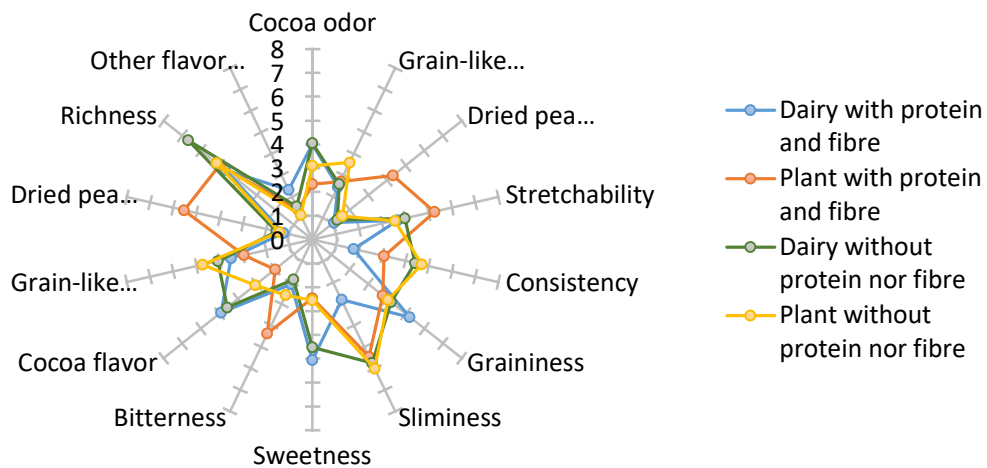

(B)

**Figure S2.** Sensory profiling for drinkable and spoonable samples. (A) Spider plot of the sensory profile of drinkable cocoa-flavored samples. The plot is drawn using average values of 10 assessors and two replicate evaluations. (B) Spider plot of the sensory profile of spoonable cocoa-flavored samples. The plot is drawn using average values of 10 assessors and two replicate evaluations.

**Supplementary data Figure S3.**

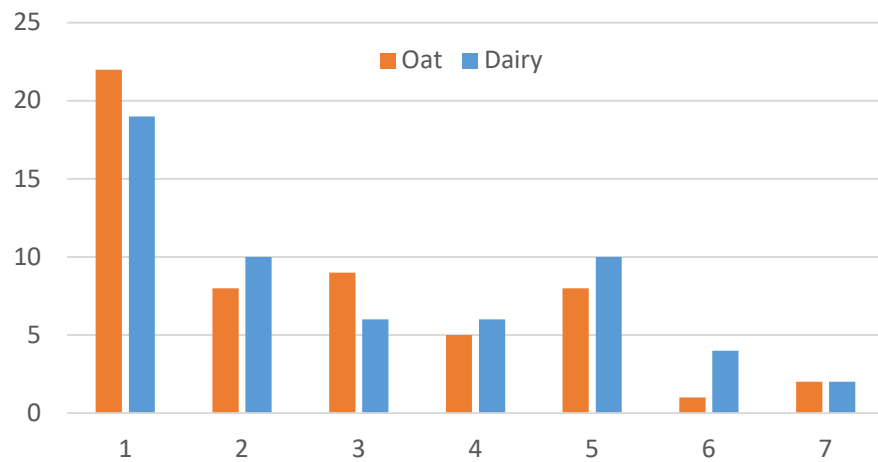

**(A)**

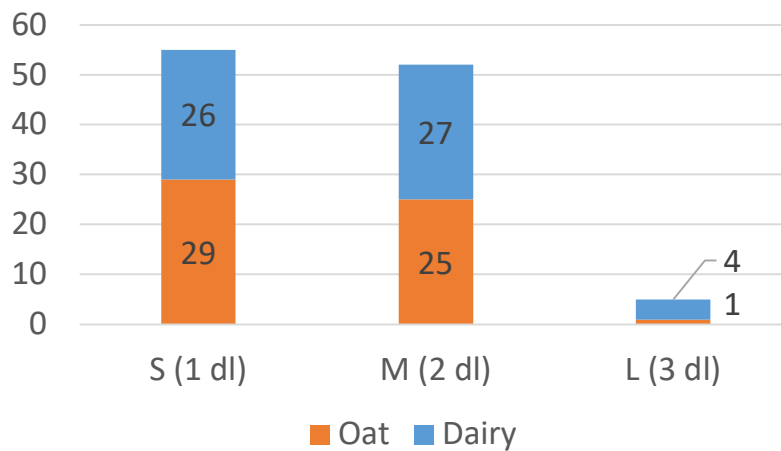

**(B)**

**Figure S3.** Preferred base and size of the products. **(A)** Consumers' willingness to buy the samples in the coming month from HSM as they were presented in the consumer test. 1 = very unlikely to buy, 7 = very likely to buy. There was no significant association between sample type and willingness to buy. **(B)** Consumers' preferred portion sizes for the cocoa-flavored samples. There was no significant association between sample type and preferred portion size.
